# Supplementary material for: Emergency care capacity in Freetown, Sierra Leone: a service evaluation
Source: Springer Nature journal article supplement (doi:10.1186/s12873-015-0027-4), 2015-02-02
Supplement: MOESM1 [file 9737090]

## Structure Standards for Emergency and Critical Care in Low Income Countries

### The hospital should have

#### An infrastructure designed for managing emergency and critically ill adults and children

|                                  |   |                                                                                                 |
|----------------------------------|---|-------------------------------------------------------------------------------------------------|
| <b>Infrastructure Indicators</b> | 1 | Designated Triage Area<br>For adults<br>For children                                            |
|                                  | 2 |                                                                                                 |
|                                  | 3 | Designated Emergency Room / Area<br>For adults<br>For children                                  |
|                                  | 4 |                                                                                                 |
|                                  | 5 | An ICU or a designated area of a ward for critically ill patients<br>For adults<br>For children |
|                                  | 6 |                                                                                                 |

#### Sufficient human resources for managing emergency and critically ill adults and children

|                                  |    |                                                                                                                                          |
|----------------------------------|----|------------------------------------------------------------------------------------------------------------------------------------------|
| <b>Human Resource Indicators</b> | 7  | Nurse/other health worker either working in the ER or having the task of immediately going to the ER if a critically ill patient arrives |
|                                  | 8  | A clinician either working in the ER or being "on-call" for the ER if a critically ill patient arrives                                   |
|                                  | 9  | A designated "Medical Head of ICU"                                                                                                       |
|                                  | 10 | A higher ratio of staff: patients on ICU than on general wards                                                                           |

#### Sufficiently trained staff for managing emergency and critically ill adults and children

|                            |    |                                                                                                                  |
|----------------------------|----|------------------------------------------------------------------------------------------------------------------|
| <b>Training Indicators</b> | 11 | Nurses and clinicians involved in adult triage have been trained in adult triage                                 |
|                            | 12 | Nurses and clinicians involved in emergency care of adults have undergone training in emergency care             |
|                            | 13 | Nurses and clinicians involved in critical care for adults have undergone training in critical care              |
|                            | 14 | Nurses and clinicians involved in paediatric triage have been trained in paediatric triage                       |
|                            | 15 | Nurses and clinicians involved in emergency care of children have undergone training in emergency care           |
|                            | 16 | Nurses and clinicians involved in critical care for children have undergone training in paediatric critical care |

#### Essential drugs for emergency and critical care

|                        |                 |                                                  |
|------------------------|-----------------|--------------------------------------------------|
| <b>Drug Indicators</b> | 17              | Oral Rehydration Solution                        |
|                        | 18              | IV glucose                                       |
|                        | 19              | IV crystalloid (Normal Saline ± Ringers Lactate) |
|                        | 20              | Diazepam                                         |
|                        | 21              | Paracetamol                                      |
|                        | 22              | Parenteral Penicillin (or equivalent)            |
|                        | 23              | Parenteral Gentamycin (or equivalent)            |
|                        | 24              | Parenteral Quinine (or other anti-malarial)      |
|                        | 25              | Ketamine                                         |
|                        | 26              | Lidocaine                                        |
|                        | 27              | Adrenaline                                       |
|                        | 28              | Atropine                                         |
|                        | 29              | Furosemide                                       |
|                        | 30              | Nifedipine or other anti-hypertensive            |
|                        | 31              | Aminophylline                                    |
|                        | 32              | Salbutamol (for inhaler or nebuliser)            |
|                        | 33              | Hydrocortisone                                   |
|                        | 34              | Insulin                                          |
| 35                     | IV/IM opioids   |                                                  |
| 36                     | Naloxone        |                                                  |
| 37                     | Thiopentone     |                                                  |
| 38                     | Succinylcholine |                                                  |

Structure Standards for EaCC in Low Income Countries

|    |                                  |
|----|----------------------------------|
| 39 | Non-depolarising muscle relaxant |
| 40 | Oxytocin/Ergotamine              |
| 41 | Magnesium Sulphate               |
| 42 | Phenobarbital / Phenytoin        |

**Essential equipment for emergency and critical care**

|                             |                                                                                                                                                       |                                                               |
|-----------------------------|-------------------------------------------------------------------------------------------------------------------------------------------------------|---------------------------------------------------------------|
| <b>Equipment Indicators</b> | 43                                                                                                                                                    | Clock with second hand                                        |
|                             | 44                                                                                                                                                    | Gloves - clean                                                |
|                             | 45                                                                                                                                                    | Gloves - sterile                                              |
|                             | 46                                                                                                                                                    | Sharps disposal                                               |
|                             | 47                                                                                                                                                    | Running water & soap                                          |
|                             | 48                                                                                                                                                    | Oral airway (Guedel) – adult & paediatric sizes               |
|                             | 49                                                                                                                                                    | Suction machine (foot powered or electric) & tubing           |
|                             | 50                                                                                                                                                    | Laryngoscope (working)                                        |
|                             | 51                                                                                                                                                    | Endotracheal Tubes – adult & paediatric sizes                 |
|                             | 52                                                                                                                                                    | Rigid neck collar or Sandbags/Towel rolls and head restraints |
|                             | 53                                                                                                                                                    | Chest tube & underwater seal (or equivalent)                  |
|                             | 54                                                                                                                                                    | Pulse oximeter                                                |
|                             | 55                                                                                                                                                    | Bag valve mask (Ambu bag)                                     |
|                             | 56                                                                                                                                                    | Stethoscope                                                   |
|                             | 57                                                                                                                                                    | Foetal stethoscope                                            |
|                             | 58                                                                                                                                                    | Blood pressure cuff                                           |
|                             | 59                                                                                                                                                    | IV cannulae – adult size (eg 18G)                             |
|                             | 60                                                                                                                                                    | IV cannulae – paediatric size (eg 22G, 24G)                   |
|                             | 61                                                                                                                                                    | IV giving sets                                                |
|                             | 62                                                                                                                                                    | Needles                                                       |
|                             | 63                                                                                                                                                    | Syringes – 2ml & 5ml                                          |
|                             | 64                                                                                                                                                    | Urine catheters & bags                                        |
|                             | 65                                                                                                                                                    | Gauze & bandages                                              |
|                             | 66                                                                                                                                                    | Skin disinfectant                                             |
|                             | 67                                                                                                                                                    | Torch                                                         |
|                             | 68                                                                                                                                                    | Electricity 24hours/day                                       |
| 69                          | Light suitable for clinical examination                                                                                                               |                                                               |
| 70                          | Bedside blood sugar testing device & strips                                                                                                           |                                                               |
| 71                          | Weighing scales                                                                                                                                       |                                                               |
| 72                          | Thermometer                                                                                                                                           |                                                               |
| 73                          | Refrigerator                                                                                                                                          |                                                               |
| 74                          | Nasogastric Tubes                                                                                                                                     |                                                               |
| 75                          | Oxygen concentrator / cylinder with face masks or nasal prongs and tubing                                                                             |                                                               |
| 76                          | System for ensuring continuous availability of oxygen (eg reserve electricity generator / reserve cylinders with good transport and refilling system) |                                                               |

**Routines for managing emergency and critically ill adults and children**

|                            |          |                                                                                                                       |
|----------------------------|----------|-----------------------------------------------------------------------------------------------------------------------|
| <b>Routines Indicators</b> | 77<br>78 | System for categorising patients according to clinical urgency (triage)<br>For adults<br>For children                 |
|                            | 79<br>80 | System for prioritising the treatment of critically ill patients before stable patients<br>For adults<br>For children |
|                            | 81<br>82 | Admission registration and payment delayed until after triage and emergency treatment<br>For adults                   |

|          |                                                                                                                                                |              |
|----------|------------------------------------------------------------------------------------------------------------------------------------------------|--------------|
|          |                                                                                                                                                | For children |
| 83       | ICU admission/discharge criteria                                                                                                               |              |
| 84<br>85 | Nurses have a routine of frequent observations of the patients ( hourly or specified depending on clinical need)<br>For adults<br>For children |              |
| 86<br>87 | Clinicians check patients (ward rounds) at least twice a day<br>For adults<br>For children                                                     |              |
| 88       | There is a system for identifying critically ill patients on general wards and transferring to ICU (A "track and trigger" system)              |              |

**Guidelines for managing emergency and critically ill adults and children**

|                              |          |                                                             |
|------------------------------|----------|-------------------------------------------------------------|
| <b>Guidelines Indicators</b> | 89<br>90 | Guidelines for triage<br>For adults<br>For children         |
|                              | 91<br>92 | Guidelines for Emergency Care<br>For adults<br>For children |
|                              | 93<br>94 | Guidelines for Critical Care<br>For adults<br>For children  |
|                              | 95       | Guidelines for Oxygen use                                   |

**Support Services for managing emergency and critically ill adults and children**

|                                    |            |                                                                                                                                                                                            |
|------------------------------------|------------|--------------------------------------------------------------------------------------------------------------------------------------------------------------------------------------------|
| <b>Support Services Indicators</b> | 96         | Lab with facilities and trained personnel to measure Haemoglobin                                                                                                                           |
|                                    | 97         | Lab with facilities and trained personnel to measure blood glucose                                                                                                                         |
|                                    | 98         | Lab with facilities and personnel to measure Serum Urea/Creatinine, Sodium and Potassium                                                                                                   |
|                                    | 99         | X-ray facilities and trained personnel for chest radiographs                                                                                                                               |
|                                    | 100        | System for emergency blood transfusion                                                                                                                                                     |
|                                    | 101        | System for making cross matched blood available within 1 hour of blood sample arriving in lab                                                                                              |
|                                    | 102        | System for testing donor blood for the viruses HIV, Hepatitis B & C                                                                                                                        |
|                                    | 103<br>104 | Lab with facilities and trained personnel to do direct microscopy & bacterial gram stain<br>Lab with facilities and trained personnel to do bacterial culture and antibiotic sensitivities |

IV intravenous; IM intramuscular;

## Advanced Emergency & Critical Care Indicators

**The hospital has:**

|    |                                    |
|----|------------------------------------|
| 1  | Ventilator                         |
| 2  | Piperacillin/Meropenem             |
| 3  | Colloid                            |
| 4  | Fresh Frozen Plasma                |
| 5  | Propofol or Midazolam              |
| 6  | Noradrenaline or Dobutamine        |
| 7  | Invasive Blood Pressure Monitoring |
| 8  | Central Venous Pressure Monitoring |
| 9  | Aterial Blood Gas analysis         |
| 10 | Syringe pump                       |

## References

1. WHO. Emergency Triage Assessment and Treatment (ETAT). Geneva: WHO Press; 2005.
2. WHO. Guidelines for Essential Trauma Care: WHO Press; 2004
3. WHO. Pocket Book of Hospital Care for Children. Geneva: WHO; 2005.
4. AMDDColumbiaUniversity. Toolbook for Improving Quality of Emergency Obetric Services. 2003.
5. WHO. Surgical care at the district hospital. Geneva: WHO Press; 2003.
6. WHO. Generic Essential Emergency Equipment List. Geneva; 2006.
7. WHO. Anaesthesia at the district hospital. Geneva; 2000.
8. Watters D, Wilson I, Leaver R, Bagshawe A. Care of the Critically Ill Patient in the Tropics. Oxford: Macmillan Publishers; 2004.
9. NICE. Acutely ill patients in hospital: recognition of and response to acute illness in adults in hospital. National Institute for Health and Clinical Excellence Clinical Guideline 50. 2007.
10. NCEPOD. An Acute Problem? Report by The National Confidential Enquiry into Patient Outcome and Death. 2005.
11. EMSSA. Emergency Medicine Society of South Africa Practice Guidelines <http://www.emssa.org.za/documents.php> (Accessed 6/3/09). 2008.
12. Jarman B, Gault S, Alves B, Hider A, Dolan S, Cook A, et al. Explaining differences in English hospital death rates using routinely collected data. Bmj. 1999; **318**(7197): 1515-20.
